# Supplementary material
Source: PubMed Central journal article supplement (PMC4655141)
Supplement: NIHMS722457-supplement-supplement_1.pdf [file NIHMS722457-supplement-supplement_1.pdf]

## Supplementary Methods

### *Multiple Imputation*

We performed multiple imputation by using the PROC MI procedure in SAS version 9.4 (SAS Institute, Cary, NC) by using a Markov Chain Monte Carlo method that assumes multivariate normality for the distribution of laboratory values and an arbitrary missingness pattern. The lab values ALT, AST, and creatinine were log-transformed to approximate the normality in the imputation process, and then imputed values were transformed back to their original scales for further data analysis. We also included

the survival outcomes in the multiple imputation procedure, which would yield more valid results than multiple imputation without survival.<sup>28</sup> In total, 10 completed data sets were imputed, and on each data set we performed the Cox proportion-hazards regression analyses, the parameter estimates of which (ie, hazard ratios) were combined by using the PROC MIANALYZE procedure to incorporate missing-data uncertainty. Three statistics of assessing discrimination, including Harrell C statistic, integrated IDI, and category-free NRI were summarized by taking the average values of the 10 imputed sets. The basic summaries of demographics and clinical values were based on 1 of 10 imputed sets, and the between-imputation variations were minimal (data not presented).

1103  
1104  
1105  
1106  
1107  
1108  
1109  
1110  
1111  
1112  
1113  
1114  
1115  
1116  
1117  
1118  
1119  
1120  
1121  
1122  
1123  
1124  
1125  
1126  
1127  
1128  
1129  
1130  
1131  
1132  
1133  
1134  
1135  
1136  
1137  
1138  
1139  
1140  
1141  
1142  
1143  
1144  
1145  
1146  
1147  
1148  
1149  
1150  
1151  
1152  
1153  
1154  
1155  
1156  
1157  
1158  
1159  
1160

UNCORRECTED PROOF

**Supplementary**

**Figure 1.** Comparison of eCTP with chart-extracted CTP assignments. (A) Cohort of HCC patients with complete data in assigned quarter (N = 80). (B) Cohort of cirrhotic patients with complete data in the assigned quarter (N = 56).

|           |    | HCC Cohort (N=80 with complete data) |    |   |   |   |    |    |    |
|-----------|----|--------------------------------------|----|---|---|---|----|----|----|
|           |    | electronic CTP                       |    |   |   |   |    |    |    |
|           |    | 5                                    | 6  | 7 | 8 | 9 | 10 | 11 | 12 |
| chart CTP | 5  | 22                                   | 2  | 1 | 0 | 0 | 0  | 0  | 0  |
|           | 6  | 8                                    | 19 | 2 | 0 | 0 | 0  | 0  | 0  |
|           | 7  | 1                                    | 4  | 6 | 2 | 0 | 0  | 0  | 0  |
|           | 8  | 0                                    | 1  | 2 | 3 | 1 | 0  | 0  | 0  |
|           | 9  | 0                                    | 0  | 0 | 0 | 2 | 1  | 0  | 0  |
|           | 10 | 0                                    | 0  | 0 | 1 | 0 | 0  | 0  | 0  |
|           | 11 | 0                                    | 0  | 0 | 0 | 0 | 0  | 1  | 0  |
|           | 12 | 0                                    | 0  | 0 | 0 | 0 | 0  | 0  | 1  |

  

|           |    | Cirrhosis Cohort (N=56 with complete data) |    |   |   |   |    |    |    |
|-----------|----|--------------------------------------------|----|---|---|---|----|----|----|
|           |    | electronic CTP                             |    |   |   |   |    |    |    |
|           |    | 5                                          | 6  | 7 | 8 | 9 | 10 | 11 | 12 |
| chart CTP | 5  | 21                                         | 3  | 1 | 0 | 0 | 0  | 0  | 0  |
|           | 6  | 3                                          | 11 | 1 | 0 | 0 | 0  | 0  | 0  |
|           | 7  | 0                                          | 2  | 2 | 1 | 0 | 0  | 0  | 0  |
|           | 8  | 0                                          | 0  | 0 | 0 | 0 | 1  | 0  | 0  |
|           | 9  | 0                                          | 0  | 0 | 2 | 3 | 1  | 0  | 0  |
|           | 10 | 0                                          | 0  | 0 | 1 | 1 | 1  | 0  | 0  |
|           | 11 | 0                                          | 0  | 0 | 0 | 0 | 0  | 0  | 0  |
|           | 12 | 0                                          | 0  | 0 | 0 | 0 | 0  | 1  | 0  |

**Kaplan-Meier Survival Curve**  
With Number of Subjects at Risk

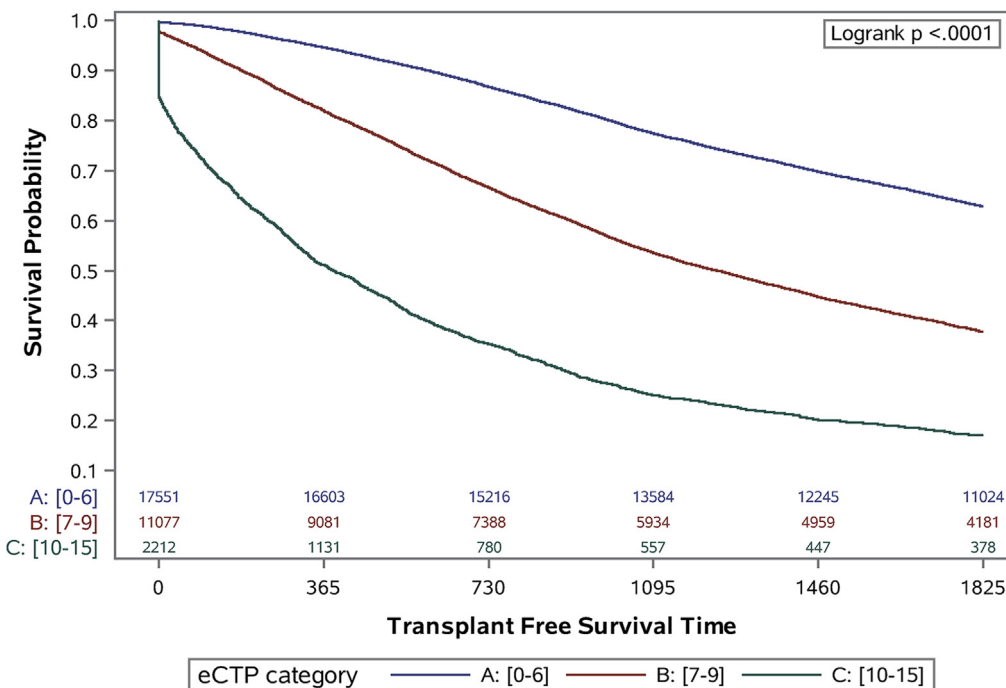

**Supplementary**

**Figure 2.** Kaplan-Meier survival curve for 5-year TFS by eCTP class. eCTP A (5-6) shown in blue, B (7-9) in red, and C (10-15) in green.

**Supplementary Table 1.** Data Elements and Algorithm for Calculation of eCTP Ascites Subscore

| Domain            | Variable                                                                                                                                                  | Logic                                                                                                                                                                                                                                                                                                                                                                                                                                                                                                                                                                                                                                                                                                                                                                                                                                                                                                                                                                                                        |
|-------------------|-----------------------------------------------------------------------------------------------------------------------------------------------------------|--------------------------------------------------------------------------------------------------------------------------------------------------------------------------------------------------------------------------------------------------------------------------------------------------------------------------------------------------------------------------------------------------------------------------------------------------------------------------------------------------------------------------------------------------------------------------------------------------------------------------------------------------------------------------------------------------------------------------------------------------------------------------------------------------------------------------------------------------------------------------------------------------------------------------------------------------------------------------------------------------------------|
| CPT               | LVPPRE6CNT                                                                                                                                                | Count of large volume paracentesis (LVP, CPT 49082) in 6 months before index date                                                                                                                                                                                                                                                                                                                                                                                                                                                                                                                                                                                                                                                                                                                                                                                                                                                                                                                            |
|                   | LVPPOST1CNT                                                                                                                                               | Count of large volume paracentesis (LVP, CPT 49082) in 1 month after index date                                                                                                                                                                                                                                                                                                                                                                                                                                                                                                                                                                                                                                                                                                                                                                                                                                                                                                                              |
|                   | TIPSSPREOTPT                                                                                                                                              | Count of transjugular intrahepatic shunt (CPT 37182 or 37183) preceding index date                                                                                                                                                                                                                                                                                                                                                                                                                                                                                                                                                                                                                                                                                                                                                                                                                                                                                                                           |
| Pharmacy          | SPIR1PRE3                                                                                                                                                 | Any 30-day fill of spironolactone in 3 months before index date                                                                                                                                                                                                                                                                                                                                                                                                                                                                                                                                                                                                                                                                                                                                                                                                                                                                                                                                              |
|                   | SPIR3PRE3                                                                                                                                                 | Any 3 × 30-day or 1 × 90-day fill of spironolactone in 3 months before index date                                                                                                                                                                                                                                                                                                                                                                                                                                                                                                                                                                                                                                                                                                                                                                                                                                                                                                                            |
|                   | SPIR1POST1                                                                                                                                                | Any 30- or 90-day fill of spironolactone within the month after diagnosis                                                                                                                                                                                                                                                                                                                                                                                                                                                                                                                                                                                                                                                                                                                                                                                                                                                                                                                                    |
|                   | FUR1PRE3                                                                                                                                                  | Any 30-day fill of furosemide in 3 months before index date                                                                                                                                                                                                                                                                                                                                                                                                                                                                                                                                                                                                                                                                                                                                                                                                                                                                                                                                                  |
|                   | FUR3PRE3                                                                                                                                                  | Any 3 × 30-day or 1 × 90-day fill of furosemide in 3 months before index date                                                                                                                                                                                                                                                                                                                                                                                                                                                                                                                                                                                                                                                                                                                                                                                                                                                                                                                                |
|                   | FUR1POST1                                                                                                                                                 | Any 30- or 90-day fill of furosemide within the month after diagnosis                                                                                                                                                                                                                                                                                                                                                                                                                                                                                                                                                                                                                                                                                                                                                                                                                                                                                                                                        |
|                   | AMIL1PRE3                                                                                                                                                 | Any 30-day fill of amiloride in 3 months before index date                                                                                                                                                                                                                                                                                                                                                                                                                                                                                                                                                                                                                                                                                                                                                                                                                                                                                                                                                   |
|                   | AMIL3PRE3                                                                                                                                                 | Any 3 × 30-day or 1 × 90-day fill of amiloride in 3 months before index date                                                                                                                                                                                                                                                                                                                                                                                                                                                                                                                                                                                                                                                                                                                                                                                                                                                                                                                                 |
|                   | AMIL1POST1                                                                                                                                                | Any 30- or 90-day fill of amiloride within the month after diagnosis                                                                                                                                                                                                                                                                                                                                                                                                                                                                                                                                                                                                                                                                                                                                                                                                                                                                                                                                         |
| ICD9              | ASCPRE6INPT                                                                                                                                               | ICD9-CM code for ascites (789.5x) during inpatient visit in 6 months before index date                                                                                                                                                                                                                                                                                                                                                                                                                                                                                                                                                                                                                                                                                                                                                                                                                                                                                                                       |
|                   | ASCPPOST1INPT                                                                                                                                             | ICD9-CM code for ascites (789.5x) during inpatient visit in 1 month after HCC diagnosis                                                                                                                                                                                                                                                                                                                                                                                                                                                                                                                                                                                                                                                                                                                                                                                                                                                                                                                      |
|                   | ASCPRE6OTPT                                                                                                                                               | ICD9-CM code for ascites (789.5x) during outpatient visit in 6 months before index date                                                                                                                                                                                                                                                                                                                                                                                                                                                                                                                                                                                                                                                                                                                                                                                                                                                                                                                      |
|                   | ASCPPOST1OTPT                                                                                                                                             | ICD9-CM code for ascites (789.5x) during outpatient visit in 1 month after HCC diagnosis                                                                                                                                                                                                                                                                                                                                                                                                                                                                                                                                                                                                                                                                                                                                                                                                                                                                                                                     |
|                   | SBPPRE6INPT                                                                                                                                               | ICD9-CM code for spontaneous bacterial peritonitis (567.9) during inpatient visit in 6 months before index date                                                                                                                                                                                                                                                                                                                                                                                                                                                                                                                                                                                                                                                                                                                                                                                                                                                                                              |
|                   | HRSPRE6INPT                                                                                                                                               | ICD9-CM code for hepatorenal syndrome (572.4) during inpatient visit in 6 months before index date                                                                                                                                                                                                                                                                                                                                                                                                                                                                                                                                                                                                                                                                                                                                                                                                                                                                                                           |
|                   | SBPPRE6OTPT                                                                                                                                               | ICD9-CM code for spontaneous bacterial peritonitis (567.9) during outpatient visit in 6 months before index date                                                                                                                                                                                                                                                                                                                                                                                                                                                                                                                                                                                                                                                                                                                                                                                                                                                                                             |
|                   | HRSPRE6OTPT                                                                                                                                               | ICD9-CM code for hepatorenal syndrome (572.4) during outpatient visit in 6 months before index date                                                                                                                                                                                                                                                                                                                                                                                                                                                                                                                                                                                                                                                                                                                                                                                                                                                                                                          |
| Ascites score = 3 | LVPPRE6CNT is > 1 OR (LVPPOST1CNT = 1 and LVPPRE6CNT = 1) OR SBPPRE6INPT = 1 OR SBPPRE6OTPT = 1 OR HRSPRE6INPT = 1 OR HRSPRE6OTPT = 1 OR TIPSSPREOTPT = 1 |                                                                                                                                                                                                                                                                                                                                                                                                                                                                                                                                                                                                                                                                                                                                                                                                                                                                                                                                                                                                              |
| Ascites score = 2 | Criteria for ascites score 3 not met AND                                                                                                                  | Algorithm 1 (any diuretic fill, not including furosemide): LVPPRE6CNT = 1 OR LVPPOST1CNT = 1 OR ASCPOST1INPT = 1 OR ASCPOST1OTPT = 1 OR ASCPRE6INPT = 1 OR ASCPRE6OTPT = 1 OR SPIR1POST = 1 OR SPIR1PRE3 = 1 OR AMIL1POST = 1 OR AMIL1PRE3 = 1<br>Algorithm 2 (3-month fill, not including furosemide): LVPPRE6CNT = 1 OR LVPPOST1CNT = 1 OR ASCPOST1INPT = 1 OR ASCPOST1OTPT = 1 OR ASCPRE6INPT = 1 OR ASCPRE6OTPT = 1 OR SPIR1POST = 1 OR SPIR1PRE3 = 1 OR AMIL1POST = 1 OR AMIL1PRE3 = 1<br>Algorithm 3 (any fill, including furosemide): LVPPRE6CNT = 1 OR LVPPOST1CNT = 1 OR ASCPOST1INPT = 1 OR ASCPOST1OTPT = 1 OR ASCPRE6INPT = 1 OR ASCPRE6OTPT = 1 OR SPIR1POST = 1 OR SPIR1PRE3 = 1 OR AMIL1POST = 1 OR AMIL1PRE3 = 1<br>Algorithm 4 (3-month fill, including furosemide): LVPPRE6CNT = 1 OR LVPPOST1CNT = 1 OR ASCPOST1INPT = 1 OR ASCPOST1OTPT = 1 OR ASCPRE6INPT = 1 OR ASCPRE6OTPT = 1 OR SPIR1POST1 = 1 OR SPIR3PRE3 = 1 OR AMIL1POST1 = 1 OR AMIL3PRE3 = 1 OR FUR1POST1 = 1 OR FUR3PRE3 = 1 |
| Ascites score = 1 | Criteria for ascites score 3 and score 2 not met                                                                                                          |                                                                                                                                                                                                                                                                                                                                                                                                                                                                                                                                                                                                                                                                                                                                                                                                                                                                                                                                                                                                              |

**Supplementary Table 2.** Data Elements and Algorithm for Calculation of eCTP Encephalopathy Subscore

| Domain                   | Variable                                                | Logic                                                                                                            |
|--------------------------|---------------------------------------------------------|------------------------------------------------------------------------------------------------------------------|
| Pharmacy                 | LAC1PRE3                                                | Any 30-day fill of lactulose in 3 months before index date                                                       |
|                          | LAC3PRE3                                                | Any 3 × 30-day or 1 × 90-day fill of lactulose in 3 months before index date                                     |
|                          | LAC1POST1                                               | Any 30- or 90-day fill of lactulose within the month after diagnosis                                             |
|                          | RIF1PRE3                                                | Any 30-day fill of rifaximin in 3 months before index date                                                       |
|                          | RIF3PRE3                                                | Any 3 × 30-day or 1 × 90-day fill of rifaximin in 3 months before index date                                     |
| ICD9                     | RIF1POST1                                               | Any 30- or 90-day fill of rifaximin within the month after diagnosis                                             |
|                          | HEPRE6INPT                                              | ICD9-CM code for Hepatic Encephalopathy (572.2x) during inpatient visit in 6 months before index date            |
|                          | HEPOST1INPT                                             | ICD9-CM code for Hepatic Encephalopathy (572.2x) during inpatient visit in 1 month after HCC diagnosis           |
|                          | HEPRE6OTPT                                              | ICD9-CM code for Hepatic Encephalopathy (572.2x) during outpatient visit in 6 months before index date           |
|                          | HEPOST1OTPT                                             | ICD9-CM code for Hepatic Encephalopathy (572.2x) during outpatient visit in 1 month after HCC diagnosis          |
| Encephalopathy score = 3 | HEPRE6INPT + HEPOST1INPT > 1                            |                                                                                                                  |
| Encephalopathy score = 2 | Criteria for Encephalopathy score 3 not met AND         | Algorithm 1: LAC1PRE3 = 1 OR RIF1PRE3 = 1 OR LAC1POST1 = 1 OR RIF1POST1 = 1 OR HEPRE6OTPT = 1 OR HEPOST1OTPT = 1 |
|                          |                                                         | Algorithm 2: LAC3PRE3 = 1 OR RIF3PRE3 = 1 OR LAC1POST1 = 1 OR RIF1POST1 = 1 OR HEPRE6OTPT = 1 OR HEPOST1OTPT = 1 |
| Encephalopathy score = 1 | Criteria for Encephalopathy score 3 and score 2 not met |                                                                                                                  |

**Supplementary Table 3.** Cox Regression and Harrell's C Statistic for Individual Predictive Models of 1- to 4-year TFS

| Variables                              | 1-year TFS                             |         |                       | 2-year TFS                             |         |                       |
|----------------------------------------|----------------------------------------|---------|-----------------------|----------------------------------------|---------|-----------------------|
|                                        | Summary statistic Adjusted HR (95% CI) | P value | Harrell's C statistic | Summary statistic Adjusted HR (95% CI) | P value | Harrell's C statistic |
| eCTP (first quarter 2008) <sup>a</sup> | 1.63 (1.60–1.65)                       | <.0001  | 0.756 (0.005)         | 1.52 (1.50–1.54)                       | <.0001  | 0.717 (0.003)         |
| VACS (change to 10 unit)               | 1.39 (1.38–1.41)                       | <.0001  | 0.702 (0.005)         | 1.34 (1.32–1.35)                       | <.0001  | 0.679 (0.003)         |
| MELD <sup>a</sup>                      | 1.11 (1.10–1.11)                       | <.0001  | 0.670 (0.005)         | 1.08 (1.08–1.09)                       | <.0001  | 0.645 (0.003)         |
| CDI <sup>a</sup>                       | 1.51 (1.48–1.54)                       | <.0001  | 0.671 (0.005)         | 1.42 (1.41–1.44)                       | <.0001  | 0.645 (0.003)         |
| Variables                              | 3-year TFS                             |         |                       | 4-year TFS                             |         |                       |
|                                        | Summary statistic Adjusted HR (95% CI) | P value | Harrell's C statistic | Summary statistic Adjusted HR (95% CI) | P value | Harrell's C statistic |
| eCTP (first quarter 2008) <sup>a</sup> | 1.45 (1.44–1.47)                       | <.0001  | 0.698 (0.003)         | 1.42 (1.40–1.43)                       | <.0001  | 0.686 (0.003)         |
| VACS (change to 10 unit)               | 1.30 (1.29–1.31)                       | <.0001  | 0.667 (0.003)         | 1.28 (1.28–1.29)                       | <.0001  | 0.661 (0.003)         |
| MELD <sup>a</sup>                      | 1.07 (1.07–1.08)                       | <.0001  | 0.633 (0.003)         | 1.07 (1.06–1.07)                       | <.0001  | 0.626 (0.003)         |
| CDI <sup>a</sup>                       | 1.37 (1.35–1.38)                       | <.0001  | 0.631 (0.003)         | 1.34 (1.33–1.36)                       | <.0001  | 0.624 (0.003)         |

CI, confidence interval; HR, hazard ratio.

<sup>a</sup>Adjusted for age and gender.

**Supplementary Table 4.** Incremental Value of NRI and IDI for New Predictor of 5-year TFS

| Quarter        | NRI                 |         | IDI                 |         |
|----------------|---------------------|---------|---------------------|---------|
|                | Estimate (95% CI)   | P value | Estimate (95% CI)   | P value |
| <b>Q1 2008</b> |                     |         |                     |         |
| eCTP           | 0.280 (0.269–0.290) | <.001   | 0.109 (0.103–0.115) | <.001   |
| VACS           | 0.244 (0.233–0.255) | <.001   | 0.091 (0.085–0.096) | <.001   |
| MELD           | 0.160 (0.149–0.170) | <.001   | 0.042 (0.038–0.046) | <.001   |
| CDI            | 0.170 (0.160–0.179) | <.001   | 0.049 (0.045–0.053) | <.001   |
| CirCom Index   | 0.079 (0.070–0.091) | <.001   | 0.021 (0.018–0.024) | <.001   |
| <b>Q2 2008</b> |                     |         |                     |         |
| eCTP           | 0.279 (0.267–0.289) | <.001   | 0.111 (0.105–0.117) | <.001   |
| VACS           | 0.240 (0.229–0.250) | <.001   | 0.088 (0.082–0.094) | <.001   |
| MELD           | 0.156 (0.145–0.166) | <.001   | 0.041 (0.037–0.045) | <.001   |
| CDI            | 0.184 (0.173–0.194) | <.001   | 0.053 (0.049–0.058) | <.001   |
| CirCom Index   | 0.086 (0.076–0.097) | <.001   | 0.022 (0.019–0.025) | <.001   |
| <b>Q3 2008</b> |                     |         |                     |         |
| eCTP           | 0.291 (0.279–0.301) | <.001   | 0.118 (0.112–0.124) | <.001   |
| VACS           | 0.241 (0.229–0.251) | <.001   | 0.090 (0.085–0.096) | <.001   |
| MELD           | 0.178 (0.168–0.188) | <.001   | 0.048 (0.044–0.052) | <.001   |
| CDI            | 0.181 (0.171–0.190) | <.001   | 0.051 (0.047–0.055) | <.001   |
| CirCom Index   | 0.079 (0.070–0.093) | <.001   | 0.020 (0.017–0.023) | <.001   |
| <b>Q4 2008</b> |                     |         |                     |         |
| eCTP           | 0.292 (0.282–0.303) | <.001   | 0.117 (0.111–0.123) | <.001   |
| VACS           | 0.253 (0.242–0.263) | <.001   | 0.095 (0.089–0.101) | <.001   |
| MELD           | 0.161 (0.150–0.172) | <.001   | 0.046 (0.042–0.050) | <.001   |
| CDI            | 0.187 (0.177–0.197) | <.001   | 0.053 (0.049–0.057) | <.001   |
| CirCom Index   | 0.097 (0.075–0.123) | <.001   | 0.019 (0.017–0.022) | <.001   |

NOTE. Summaries were computed from average results of 10 imputed data sets.

**Supplementary Table 5.** Sub-hazard Ratios and Overall Fit of eCTP, MELD, and VACS in Competing Risk Regression Models

| Model             | Quarter | n      | Events | Sub-hazard for transplant | Sub-hazard for death | Harrell's C statistic | Fine and Gray <sup>a</sup> |
|-------------------|---------|--------|--------|---------------------------|----------------------|-----------------------|----------------------------|
| eCTP              | 2008Q1  | 60,436 | 15,309 | 1.64 (1.57–1.71)          | 1.49 (1.48–1.51)     | 0.697 ± 0.003         | 6315                       |
| MELD              | 2008Q1  | 60,436 | 15,309 | 1.11 (1.09–1.12)          | 1.09 (1.08–1.09)     | 0.645 ± 0.003         | 3151                       |
| VACS <sup>b</sup> | 2008Q1  | 60,436 | 15,309 | 1.44 (1.39–1.49)          | 1.33 (1.32–1.34)     | 0.677 ± 0.003         | 5455                       |
| eCTP              | 2008Q2  | 62,066 | 15,536 | 1.66 (1.59–1.74)          | 1.48 (1.47–1.50)     | 0.690 ± 0.003         | 5931                       |
| MELD              | 2008Q2  | 62,066 | 15,536 | 1.11 (1.09–1.12)          | 1.08 (1.08–1.08)     | 0.636 ± 0.003         | 2763                       |
| VACS <sup>b</sup> | 2008Q2  | 62,066 | 15,536 | 1.45 (1.40–1.49)          | 1.31 (1.30–1.32)     | 0.669 ± 0.003         | 5036                       |
| eCTP              | 2008Q3  | 61,978 | 15,543 | 1.62 (1.56–1.69)          | 1.49 (1.47–1.50)     | 0.697 ± 0.003         | 6226                       |
| MELD              | 2008Q3  | 61,978 | 15,543 | 1.10 (1.09–1.12)          | 1.09 (1.08–1.09)     | 0.648 ± 0.003         | 3211                       |
| VACS <sup>b</sup> | 2008Q3  | 61,978 | 15,543 | 1.45 (1.40–1.49)          | 1.32 (1.31–1.33)     | 0.671 ± 0.003         | 5257                       |

<sup>a</sup>Fine and Gray likelihood ratio test.

<sup>b</sup>Per 10-unit change in regressor.

**Supplementary Table 6.** Performance of eCTP, MELD, and VACS in Predicting 5-year TFS in Specific Patient Subgroups

| Subgroup              | N    | Median eCTP | Median MELD | Median VACS | Actual TFS       | Predicted survival |                   |                      |
|-----------------------|------|-------------|-------------|-------------|------------------|--------------------|-------------------|----------------------|
|                       |      |             |             |             |                  | eCTP <sup>a</sup>  | MELD <sup>a</sup> | VACS4 <sup>a,b</sup> |
| Severe ascites        | 564  | 10          | 16          | 61          | 190 (152–243)    | 444 (384–487)      | 1256 (1157–1344)  | 1031 (985–1092)      |
| Severe encephalopathy | 938  | 10          | 15          | 59          | 297 (246–338)    | 444 (384–487)      | 1462 (1368–1558)  | 1205 (1100–1289)     |
| Total bilirubin > 3   | 2470 | 9           | 18          | 52          | 485 (447–524)    | 653 (613–715)      | 861 (768–934)     | 1407 (1332–1470)     |
| Creatinine > 3        | 555  | 7           | 28          | 81          | 712 (549–815)    | 1548 (1486–1606)   | 534 (358–797)     | 626 (535–732)        |
| INR > 2.3             | 825  | 9           | 23          | 56          | 963 (885–1088)   | 653 (613–715)      | 633 (462–835)     | 1205 (1100–1289)     |
| Coumadin exposed      | 1106 | 7           | 18          | 48          | 1452 (1311–1589) | 1548 (1486–1606)   | 861 (768–934)     | 1690 (1572–1763)     |

<sup>a</sup>Not adjusted for age and gender.<sup>b</sup>VACS score binned by 5 (0–4, 5–9, 10–14, etc).1688  
1689  
1690  
1691  
1692  
1693  
1694  
1695  
1696  
1697  
1698  
1699  
1700  
1701  
1702  
1703  
1704  
1705  
1706  
1707  
1708  
1709  
1710  
1711  
1712  
1713  
1714  
1715  
1716  
1717  
1718  
1719  
1720  
1721  
1722  
1723  
1724  
1725  
1726  
1727  
1728  
1729  
1730  
1731  
1732  
1733  
1734  
1735  
1736  
1737  
1738  
1739  
1740  
1741  
1742  
1743  
1744  
1745  
1746  
1747  
1748  
1749  
17501625  
1626  
1627  
1628  
1629  
1630  
1631  
1632  
1633  
1634  
1635  
1636  
1637  
1638  
1639  
1640  
1641  
1642  
1643  
1644  
1645  
1646  
1647  
1648  
1649  
1650  
1651  
1652  
1653  
1654  
1655  
1656  
1657  
1658  
1659  
1660  
1661  
1662  
1663  
1664  
1665  
1666  
1667  
1668  
1669  
1670  
1671  
1672  
1673  
1674  
1675  
1676  
1677  
1678  
1679  
1680  
1681  
1682  
1683  
1684  
1685  
1686  
1687
